# Supplementary material for: Lowland extirpation of anuran populations on a tropical mountain
Source: PubMed Central journal article supplement (PMC5694215; doi:10.7717/peerj.4059), 2017-11-15

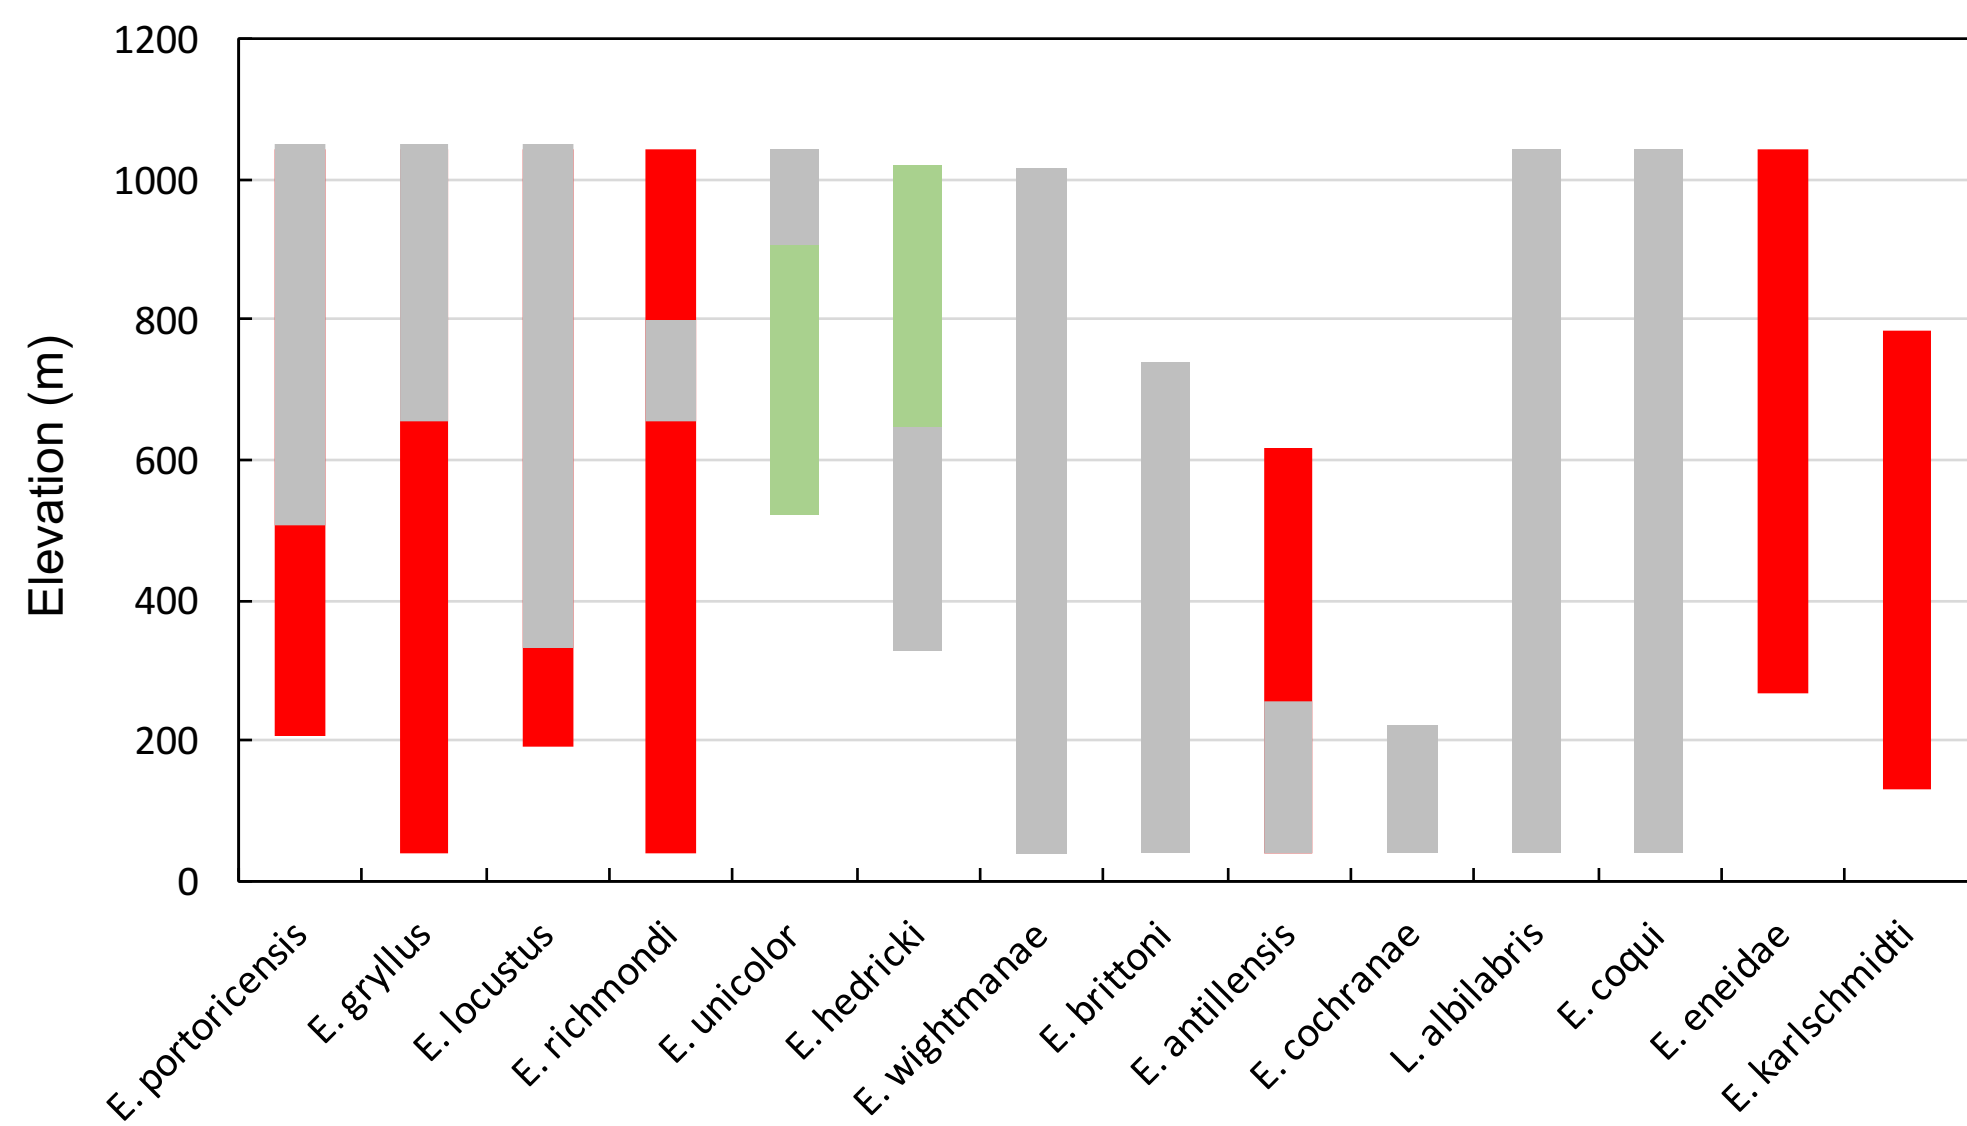

Supplement: peerj-05-4059-s001.pdf [file peerj-05-4059-s001.pdf]
