# Supplementary material for: Lowland extirpation of anuran populations on a tropical mountain
Source: PubMed Central journal article supplement (PMC5694215; doi:10.7717/peerj.4059), 2017-11-15
Supplement: peerj-05-4059-s003.pdf [file peerj-05-4059-s003.pdf]

| <b>Species</b>          | <b>Institution</b>                                                 | <b># records</b> |
|-------------------------|--------------------------------------------------------------------|------------------|
| <i>E. karlschmidti</i>  | University of Kansas Biodiversity Institute Herpetology Collection | 65               |
| <i>E. karlschmidti</i>  | Natural History Museum of Los Angeles County                       | 2                |
| <i>E. karlschmidti</i>  | California Academy of Sciences                                     | 1                |
| <i>E. brittoni</i>      | University of Kansas Biodiversity Institute Herpetology Collection | 1                |
| <i>E. brittoni</i>      | National Museum of Natural History                                 | 15               |
| <i>E. brittoni</i>      | Cornell University Museum of Vertebrates                           | 4                |
| <i>E. brittoni</i>      | Texas Natural History Collection                                   | 3                |
| <i>E. coqui</i>         | California Academy of Sciences                                     | 3                |
| <i>E. coqui</i>         | Cornell University Museum of Vertebrates                           | 435              |
| <i>E. coqui</i>         | University of Kansas Biodiversity Institute Herpetology Collection | 170              |
| <i>E. coqui</i>         | University of Colorado Museum                                      | 2                |
| <i>E. coqui</i>         | National Museum of Natural History                                 | 37               |
| <i>E. antillensis</i>   | Cornell University Museum of Vertebrates                           | 36               |
| <i>E. antillensis</i>   | The Museum of Vertebrate Zoology                                   | 1                |
| <i>E. antillensis</i>   | National Museum of Natural History                                 | 10               |
| <i>L. albilabris</i>    | California Academy of Sciences                                     | 1                |
| <i>L. albilabris</i>    | Cornell University Museum of Vertebrates                           | 9                |
| <i>L. albilabris</i>    | University of Kansas Biodiversity Institute Herpetology Collection | 14               |
| <i>L. albilabris</i>    | The Museum of Vertebrate Zoology                                   | 1                |
| <i>E. cochranæ</i>      | California Academy of Sciences                                     | 3                |
| <i>E. cochranæ</i>      | Cornell University Museum of Vertebrates                           | 4                |
| <i>E. cochranæ</i>      | National Museum of Natural History                                 | 10               |
| <i>E. eneidae</i>       | California Academy of Sciences                                     | 4                |
| <i>E. eneidae</i>       | Cornell University Museum of Vertebrates                           | 8                |
| <i>E. eneidae</i>       | University of Kansas Biodiversity Institute Herpetology Collection | 45               |
| <i>E. eneidae</i>       | Natural History Museum of Los Angeles County                       | 4                |
| <i>E. eneidae</i>       | National Museum of Natural History                                 | 4                |
| <i>E. hedricki</i>      | Museum of Comparative Zoology, Harvard University                  | 1                |
| <i>E. hedricki</i>      | Texas Natural History Collection                                   | 2                |
| <i>E. hedricki</i>      | National Museum of Natural History                                 | 4                |
| <i>E. portoricensis</i> | California Academy of Sciences                                     | 18               |
| <i>E. portoricensis</i> | C.M. Russell Museum                                                | 1                |
| <i>E. portoricensis</i> | The Canadian Museum of Nature                                      | 1                |
| <i>E. portoricensis</i> | Cornell University Museum of Vertebrates                           | 75               |
| <i>E. portoricensis</i> | University of Kansas Biodiversity Institute Herpetology Collection | 131              |
| <i>E. portoricensis</i> | Natural History Museum of Los Angeles County                       | 39               |
| <i>E. portoricensis</i> | The Museum of Vertebrate Zoology                                   | 3                |
| <i>E. portoricensis</i> | University of Colorado Museum                                      | 1                |
| <i>E. portoricensis</i> | National Museum of Natural History                                 | 15               |
| <i>E. richmondi</i>     | Monte L. Bean Life Science Museum                                  | 5                |
| <i>E. richmondi</i>     | California Academy of Sciences                                     | 12               |
| <i>E. richmondi</i>     | C.M. Russell Museum                                                | 2                |
| <i>E. richmondi</i>     | Cornell University Museum of Vertebrates                           | 8                |
| <i>E. richmondi</i>     | University of Kansas Biodiversity Institute Herpetology Collection | 65               |
| <i>E. richmondi</i>     | Natural History Museum of Los Angeles County                       | 8                |
| <i>E. richmondi</i>     | Museum of Comparative Zoology, Harvard University                  | 10               |

|                      |                                                                    |     |
|----------------------|--------------------------------------------------------------------|-----|
| <i>E. richmondi</i>  | The Museum of Vertebrate Zoology                                   | 19  |
| <i>E. richmondi</i>  | The Natural History Museum in London                               | 2   |
| <i>E. richmondi</i>  | Texas Natural History Collection                                   | 5   |
| <i>E. richmondi</i>  | National Museum of Natural History                                 | 30  |
| <i>E. unicolor</i>   | University of Kansas Biodiversity Institute Herpetology Collection | 1   |
| <i>E. unicolor</i>   | Louisiana State University, Museum of Natural Science              | 2   |
| <i>E. unicolor</i>   | Museum of Comparative Zoology, Harvard University                  | 1   |
| <i>E. unicolor</i>   | The French National Museum of Natural History                      | 1   |
| <i>E. unicolor</i>   | Texas Natural History Collection                                   | 1   |
| <i>E. unicolor</i>   | National Museum of Natural History                                 | 12  |
| <i>E. wightmanae</i> | California Academy of Sciences                                     | 3   |
| <i>E. wightmanae</i> | C.M. Russell Museum                                                | 3   |
| <i>E. wightmanae</i> | Cornell University Museum of Vertebrates                           | 16  |
| <i>E. wightmanae</i> | University of Kansas Biodiversity Institute Herpetology Collection | 27  |
| <i>E. wightmanae</i> | Natural History Museum of Los Angeles County                       | 3   |
| <i>E. wightmanae</i> | National Museum of Natural History                                 | 11  |
| <i>E. locustus</i>   | Cornell University Museum of Vertebrates                           | 14  |
| <i>E. locustus</i>   | University of Kansas Biodiversity Institute Herpetology Collection | 166 |
| <i>E. locustus</i>   | Museum of Comparative Zoology, Harvard University                  | 1   |
| <i>E. locustus</i>   | Texas Natural History Collection                                   | 5   |
| <i>E. locustus</i>   | National Museum of Natural History                                 | 18  |
| <i>E. gryllus</i>    | California Academy of Sciences                                     | 9   |
| <i>E. gryllus</i>    | C.M. Russell Museum                                                | 1   |
| <i>E. gryllus</i>    | Cornell University Museum of Vertebrates                           | 9   |
| <i>E. gryllus</i>    | University of Kansas Biodiversity Institute Herpetology Collection | 5   |
| <i>E. gryllus</i>    | Museum of Comparative Zoology, Harvard University                  | 38  |
| <i>E. gryllus</i>    | The Museum of Vertebrate Zoology                                   | 1   |
| <i>E. gryllus</i>    | The Natural History Museum in London                               | 2   |
| <i>E. gryllus</i>    | Texas Natural History Collection                                   | 6   |
| <i>E. gryllus</i>    | National Museum of Natural History                                 | 1   |

## Address

### **C.M. Russell Museum**

**C.M. Russell Museum Complex, Great Falls, Montana, in the United States.**

<https://cmrussell.org/>

### **California Academy of Sciences**

**CAS: California Academy of Sciences, Herpetology, Golden Gate Park, San Francisco, California 94118, USA.**

<http://www.calacademy.org/>

### **Cornell University Museum of Vertebrates**

**CUMV: Cornell University Museum of Vertebrates, 159 Sapsucker Woods Rd, Ithaca, NY 14850, USA**

<http://www.cumv.cornell.edu/>

### **Louisiana State University, Museum of Natural Science**

**LSUMZ: Louisiana State University, Museum of Natural Science, Baton Rouge, Louisiana 70893, USA.**

<http://www.lsu.edu/mns/>

### **Monte L. Bean Life Science Museum**

**BYU: Monte L. Bean Life Science Museum, Brigham Young University, Provo, Utah 84602, USA.**

<https://mlbean.byu.edu/>

### **Museum of Comparative Zoology, Harvard University**

**MCZ: Museum of Comparative Zoology, Harvard University, Cambridge, Massachusetts 02138, USA**

<http://www.mcz.harvard.edu/hmnh/index.html>

### **National Museum of Natural History**

**USNM: National Museum of Natural History, Amphibians and Reptiles, Washington, D.C. 20560, USA.**

<https://naturalhistory.si.edu/>

### **Natural History Museum of Los Angeles County**

**LACM: Natural History Museum of Los Angeles County, Herpetology, Los Angeles, California 90007, USA**

Natural History Museum of Los Angeles County

### **Texas Natural History Collection**

**TNHC: Texas Memorial Museum, Texas Natural History Collection, 24th and Trinity, Austin, Texas 78705, USA.**

<https://integrativebio.utexas.edu/biodiversity-collections>

### **The Canadian Museum of Nature**

**The Canadian Museum of Nature, Ottawa, Ontario, Canada.**

<http://nature.ca/en/home>

### **The French National Museum of Natural History**

**MNHN: The French National Museum of Natural History, 57 Rue Cuvier, 75005 Paris, France**

<http://www.mnhn.fr/>

### **The Museum of Vertebrate Zoology**

**MVZ: The Museum of Vertebrate Zoology, University of California, Berkeley, USA.**

<http://mvz.berkeley.edu/>

### **The Natural History Museum in London**

**NHMUK: The Natural History Museum in London, Cromwell Rd, Kensington, London SW7 5BD, UK**

<http://www.nhm.ac.uk/>

### **University of Colorado Museum**

**UCM: University of Colorado Museum, Herpetology, Campus Box 315, Boulder, Colorado 80309, USA.**

<http://www.colorado.edu/cumuseum/>

### **University of Kansas Biodiversity Institute Herpetology Collection**

**KU: University of Kansas Biodiversity Institute, Herpetology, 345 Jayhawk Blvd., Lawrence, KS 66045**

<https://biodiversity.ku.edu/herpetology>
