# Supplementary material for: Lowland extirpation of anuran populations on a tropical mountain
Source: PubMed Central journal article supplement (PMC5694215; doi:10.7717/peerj.4059), 2017-11-15
Supplement: peerj-05-4059-s004.pdf [file peerj-05-4059-s004.pdf]

| GBIF and Literature ID           | LAT         | LONG         | Elevation (m) | <i>E_coqui</i> | <i>E_locustus</i> |
|----------------------------------|-------------|--------------|---------------|----------------|-------------------|
| 686986656                        | 18.30757    | -65.77672    | 538           | 0              | 1                 |
| 686986548                        | 18.317617   | -65.831095   | 463           | 0              | 1                 |
| 686986568                        | 18.296603   | -65.841736   | 456           | 1              | 1                 |
| 686986472                        | 18.29872    | -65.78565    | 674           | 1              | 1                 |
| 886790124 , Gould et al 2008     | 18.269      | -65.758      | 1010          | 0              | 1                 |
| 1037809470                       | 18.27221    | -65.83351    | 985           | 1              | 1                 |
| 887917349                        | 18.29919    | -65.78035    | 672           | 1              | 1                 |
| 887170379                        | 18.27557    | -65.78866    | 687           | 0              | 1                 |
| 686784538                        | 18.303578   | -65.777054   | 514           | 0              | 1                 |
| 887917453                        | 18.307633   | -65.794455   | 1000          | 1              | 1                 |
| 1037797851                       | 18.29759    | -65.78951    | 731           | 1              | 1                 |
| 1037797855                       | 18.301      | -65.793      | 911           | 1              | 1                 |
| 1037797847                       | 18.300074   | -65.793412   | 865           | 1              | 1                 |
| 888426833, Drewry and Randy,1983 | 18.311      | -65.791      | 1027          | 0              | 1                 |
| 476566423                        | 18.272      | -65.829      | 1045          | 0              | 1                 |
| 1037796685                       | 18.269      | -65.758      | 1011          | 0              | 1                 |
| 686989627                        | 18.29766    | -65.78722    | 691           | 1              | 1                 |
| 686992146                        | 18.29053    | -65.79074    | 683           | 0              | 0                 |
| 686887253                        | 18.306006   | -65.774821   | 493           | 1              | 0                 |
| 657377329                        | 18.322304   | -65.818666   | 344           | 1              | 0                 |
| 543487714                        | 18.29522    | -65.78853    | 742           | 0              | 0                 |
| 1037797516                       | 18.321198   | -65.81572    | 412           | 1              | 0                 |
| 686989614                        | 18.310852   | -65.792862   | 1024          | 1              | 0                 |
| Joglar, 1998                     | 18.30059444 | -65.78538889 | 661           | 1              | 0                 |
| Joglar, 1998                     | 18.30080556 | -65.79319444 | 850           | 1              | 1                 |
| 888144816                        | 18.30674    | -65.77775    | 560           | 1              | 0                 |
| 1037796651                       | 18.36415    | -65.81964    | 39            | 0              | 0                 |
| 886858926                        | 18.329083   | -65.820517   | 244           | 0              | 0                 |
| 1037796213                       | 18.34654    | -65.7627     | 97            | 1              | 0                 |
| 886890302                        | 18.311866   | -65.77722    | 489           | 0              | 0                 |
| 1037797225                       | 18.27055    | -65.75945    | 985           | 0              | 0                 |
| 1037797430                       | 18.294862   | -65.784617   | 758           | 1              | 0                 |
| 686887247                        | 18.303063   | -65.78429    | 650           | 1              | 0                 |
| Drewry and Randy,1983            | 18.282739   | -65.856976   | 600           | 1              | 1                 |
| 866440579,Drewry and Randy,1983  | 18.32254    | -65.817439   | 371           | 1              | 1                 |
| Gould et al 2008                 | 18.303      | -65.795      | 899           | 0              | 0                 |
| Gould et al 2008                 | 18.296      | -65.791      | 757           | 0              | 0                 |
| Gould et al 2008                 | 18.292      | -65.783      | 753           | 0              | 0                 |
| Gould et al 2008                 | 18.283      | -65.811      | 865           | 0              | 0                 |
| 1037796671                       | 18.332572   | -65.783419   | 371           | 1              | 0                 |
| 1037797443                       | 18.322116   | -65.82208    | 327           | 1              | 0                 |
| 1321882617                       | 18.3521     | -65.766808   | 40            | 1              | 0                 |
| 1037797764                       | 18.241308   | -65.7908     | 86            | 0              | 0                 |
| 1321151764                       | 18.3111     | -65.7712     | 461           | 1              | 0                 |
| 1319867316                       | 18.3016     | -65.7842     | 636           | 1              | 0                 |
| 1037796479                       | 18.343092   | -65.761692   | 129           | 1              | 0                 |

|            |           |            |     |   |   |
|------------|-----------|------------|-----|---|---|
| 1037809453 | 18.322848 | -65.765189 | 378 | 1 | 0 |
| 1037797448 | 18.28     | -65.77     | 877 | 1 | 0 |
| 1037796689 | 18.34113  | -65.82858  | 136 | 0 | 0 |
| 886858997  | 18.337257 | -65.760628 | 213 | 0 | 0 |
| 686985846  | 18.334517 | -65.825112 | 122 | 0 | 0 |

| GBIF and Literature ID           | LAT         | LONG         | Elevation (m) | <i>E. portoricensis</i> |
|----------------------------------|-------------|--------------|---------------|-------------------------|
| 686986656                        | 18.30757    | -65.77672    | 538           | 1                       |
| 686986548                        | 18.317617   | -65.831095   | 463           | 0                       |
| 686986568                        | 18.296603   | -65.841736   | 456           | 1                       |
| 686986472                        | 18.29872    | -65.78565    | 674           | 1                       |
| 886790124 , Gould et al 2008     | 18.269      | -65.758      | 1010          | 1                       |
| 1037809470                       | 18.27221    | -65.83351    | 985           | 1                       |
| 887917349                        | 18.29919    | -65.78035    | 672           | 1                       |
| 887170379                        | 18.27557    | -65.78866    | 687           | 0                       |
| 686784538                        | 18.303578   | -65.777054   | 514           | 0                       |
| 887917453                        | 18.307633   | -65.794455   | 1000          | 1                       |
| 1037797851                       | 18.29759    | -65.78951    | 731           | 1                       |
| 1037797855                       | 18.301      | -65.793      | 911           | 0                       |
| 1037797847                       | 18.300074   | -65.793412   | 865           | 1                       |
| 888426833, Drewry and Randy,1983 | 18.311      | -65.791      | 1027          | 0                       |
| 476566423                        | 18.272      | -65.829      | 1045          | 1                       |
| 1037796685                       | 18.269      | -65.758      | 1011          | 0                       |
| 686989627                        | 18.29766    | -65.78722    | 691           | 1                       |
| 686992146                        | 18.29053    | -65.79074    | 683           | 0                       |
| 686887253                        | 18.306006   | -65.774821   | 493           | 1                       |
| 657377329                        | 18.322304   | -65.818666   | 344           | 1                       |
| 543487714                        | 18.29522    | -65.78853    | 742           | 1                       |
| 1037797516                       | 18.321198   | -65.81572    | 412           | 1                       |
| 686989614                        | 18.310852   | -65.792862   | 1024          | 1                       |
| Joglar, 1998                     | 18.30059444 | -65.78538889 | 661           | 1                       |
| Joglar, 1998                     | 18.30080556 | -65.79319444 | 850           | 1                       |
| 888144816                        | 18.30674    | -65.77775    | 560           | 0                       |
| 1037796651                       | 18.36415    | -65.81964    | 39            | 0                       |
| 886858926                        | 18.329083   | -65.820517   | 244           | 0                       |
| 1037796213                       | 18.34654    | -65.7627     | 97            | 0                       |
| 886890302                        | 18.311866   | -65.77722    | 489           | 0                       |
| 1037797225                       | 18.27055    | -65.75945    | 985           | 1                       |
| 1037797430                       | 18.294862   | -65.784617   | 758           | 1                       |
| 686887247                        | 18.303063   | -65.78429    | 650           | 1                       |
| Drewry and Randy,1983            | 18.282739   | -65.856976   | 600           | 1                       |
| 866440579,Drewry and Randy,1983  | 18.32254    | -65.817439   | 371           | 1                       |
| Gould et al 2008                 | 18.303      | -65.795      | 899           | 1                       |
| Gould et al 2008                 | 18.296      | -65.791      | 757           | 1                       |
| Gould et al 2008                 | 18.292      | -65.783      | 753           | 1                       |
| Gould et al 2008                 | 18.283      | -65.811      | 865           | 1                       |
| 1037796671                       | 18.332572   | -65.783419   | 371           | 0                       |
| 1037797443                       | 18.322116   | -65.82208    | 327           | 0                       |
| 1321882617                       | 18.3521     | -65.766808   | 40            | 0                       |
| 1037797764                       | 18.241308   | -65.7908     | 86            | 0                       |
| 1321151764                       | 18.3111     | -65.7712     | 461           | 0                       |
| 1319867316                       | 18.3016     | -65.7842     | 636           | 0                       |
| 1037796479                       | 18.343092   | -65.761692   | 129           | 0                       |
| 1037809453                       | 18.322848   | -65.765189   | 378           | 0                       |
| 1037797448                       | 18.28       | -65.77       | 877           | 0                       |
| 1037796689                       | 18.34113    | -65.82858    | 136           | 0                       |
| 886858997                        | 18.337257   | -65.760628   | 213           | 0                       |
| 686985846                        | 18.334517   | -65.825112   | 122           | 0                       |

| GBIF and Literature ID           | LAT         | LONG         | Elevation (m) | <i>E_gryllus</i> |
|----------------------------------|-------------|--------------|---------------|------------------|
| 686986656                        | 18.30757    | -65.77672    | 538           | 0                |
| 686986548                        | 18.317617   | -65.831095   | 463           | 1                |
| 686986568                        | 18.296603   | -65.841736   | 456           | 1                |
| 686986472                        | 18.29872    | -65.78565    | 674           | 1                |
| 886790124 , Gould et al 2008     | 18.269      | -65.758      | 1010          | 0                |
| 1037809470                       | 18.27221    | -65.83351    | 985           | 0                |
| 887917349                        | 18.29919    | -65.78035    | 672           | 0                |
| 887170379                        | 18.27557    | -65.78866    | 687           | 0                |
| 686784538                        | 18.303578   | -65.777054   | 514           | 0                |
| 887917453                        | 18.307633   | -65.794455   | 1000          | 0                |
| 1037797851                       | 18.29759    | -65.78951    | 731           | 0                |
| 1037797855                       | 18.301      | -65.793      | 911           | 0                |
| 1037797847                       | 18.300074   | -65.793412   | 865           | 1                |
| 888426833, Drewry and Randy,1983 | 18.311      | -65.791      | 1027          | 1                |
| 476566423                        | 18.272      | -65.829      | 1045          | 0                |
| 1037796685                       | 18.269      | -65.758      | 1011          | 0                |
| 686989627                        | 18.29766    | -65.78722    | 691           | 1                |
| 686992146                        | 18.29053    | -65.79074    | 683           | 0                |
| 686887253                        | 18.306006   | -65.774821   | 493           | 0                |
| 657377329                        | 18.322304   | -65.818666   | 344           | 0                |
| 543487714                        | 18.29522    | -65.78853    | 742           | 1                |
| 1037797516                       | 18.321198   | -65.81572    | 412           | 0                |
| 686989614                        | 18.310852   | -65.792862   | 1024          | 1                |
| Joglar, 1998                     | 18.30059444 | -65.78538889 | 661           | 0                |
| Joglar, 1998                     | 18.30080556 | -65.79319444 | 850           | 0                |
| 888144816                        | 18.30674    | -65.77775    | 560           | 0                |
| 1037796651                       | 18.36415    | -65.81964    | 39            | 0                |
| 886858926                        | 18.329083   | -65.820517   | 244           | 0                |
| 1037796213                       | 18.34654    | -65.7627     | 97            | 0                |
| 886890302                        | 18.311866   | -65.77722    | 489           | 0                |
| 1037797225                       | 18.27055    | -65.75945    | 985           | 0                |
| 1037797430                       | 18.294862   | -65.784617   | 758           | 0                |
| 686887247                        | 18.303063   | -65.78429    | 650           | 0                |
| Drewry and Randy,1983            | 18.282739   | -65.856976   | 600           | 1                |
| 866440579,Drewry and Randy,1983  | 18.32254    | -65.817439   | 371           | 1                |
| Gould et al 2008                 | 18.303      | -65.795      | 899           | 0                |
| Gould et al 2008                 | 18.296      | -65.791      | 757           | 0                |
| Gould et al 2008                 | 18.292      | -65.783      | 753           | 1                |
| Gould et al 2008                 | 18.283      | -65.811      | 865           | 0                |
| 1037796671                       | 18.332572   | -65.783419   | 371           | 0                |
| 1037797443                       | 18.322116   | -65.82208    | 327           | 0                |
| 1321882617                       | 18.3521     | -65.766808   | 40            | 0                |
| 1037797764                       | 18.241308   | -65.7908     | 86            | 0                |
| 1321151764                       | 18.3111     | -65.7712     | 461           | 0                |
| 1319867316                       | 18.3016     | -65.7842     | 636           | 0                |
| 1037796479                       | 18.343092   | -65.761692   | 129           | 0                |

|            |           |            |     |   |
|------------|-----------|------------|-----|---|
| 1037809453 | 18.322848 | -65.765189 | 378 | 0 |
| 1037797448 | 18.28     | -65.77     | 877 | 0 |
| 1037796689 | 18.34113  | -65.82858  | 136 | 0 |
| 886858997  | 18.337257 | -65.760628 | 213 | 0 |
| 686985846  | 18.334517 | -65.825112 | 122 | 0 |

| GBIF and Literature ID           | LAT         | LONG         | Elevation (m) | <i>E_brittoni</i> |
|----------------------------------|-------------|--------------|---------------|-------------------|
| 686986656                        | 18.30757    | -65.77672    | 538           | 1                 |
| 686986548                        | 18.317617   | -65.831095   | 463           | 0                 |
| 686986568                        | 18.296603   | -65.841736   | 456           | 1                 |
| 686986472                        | 18.29872    | -65.78565    | 674           | 0                 |
| 886790124 , Gould et al 2008     | 18.269      | -65.758      | 1010          | 0                 |
| 1037809470                       | 18.27221    | -65.83351    | 985           | 0                 |
| 887917349                        | 18.29919    | -65.78035    | 672           | 0                 |
| 887170379                        | 18.27557    | -65.78866    | 687           | 0                 |
| 686784538                        | 18.303578   | -65.777054   | 514           | 0                 |
| 887917453                        | 18.307633   | -65.794455   | 1000          | 0                 |
| 1037797851                       | 18.29759    | -65.78951    | 731           | 0                 |
| 1037797855                       | 18.301      | -65.793      | 911           | 0                 |
| 1037797847                       | 18.300074   | -65.793412   | 865           | 0                 |
| 888426833, Drewry and Randy,1983 | 18.311      | -65.791      | 1027          | 0                 |
| 476566423                        | 18.272      | -65.829      | 1045          | 0                 |
| 1037796685                       | 18.269      | -65.758      | 1011          | 0                 |
| 686989627                        | 18.29766    | -65.78722    | 691           | 0                 |
| 686992146                        | 18.29053    | -65.79074    | 683           | 0                 |
| 686887253                        | 18.306006   | -65.774821   | 493           | 0                 |
| 657377329                        | 18.322304   | -65.818666   | 344           | 0                 |
| 543487714                        | 18.29522    | -65.78853    | 742           | 0                 |
| 1037797516                       | 18.321198   | -65.81572    | 412           | 0                 |
| 686989614                        | 18.310852   | -65.792862   | 1024          | 0                 |
| Joglar, 1998                     | 18.30059444 | -65.78538889 | 661           | 0                 |
| Joglar, 1998                     | 18.30080556 | -65.79319444 | 850           | 0                 |
| 888144816                        | 18.30674    | -65.77775    | 560           | 1                 |
| 1037796651                       | 18.36415    | -65.81964    | 39            | 1                 |
| 886858926                        | 18.329083   | -65.820517   | 244           | 1                 |
| 1037796213                       | 18.34654    | -65.7627     | 97            | 1                 |
| 886890302                        | 18.311866   | -65.77722    | 489           | 0                 |
| 1037797225                       | 18.27055    | -65.75945    | 985           | 0                 |
| 1037797430                       | 18.294862   | -65.784617   | 758           | 1                 |
| 686887247                        | 18.303063   | -65.78429    | 650           | 0                 |
| Drewry and Randy,1983            | 18.282739   | -65.856976   | 600           | 1                 |
| 866440579,Drewry and Randy,1983  | 18.32254    | -65.817439   | 371           | 1                 |
| Gould et al 2008                 | 18.303      | -65.795      | 899           | 0                 |
| Gould et al 2008                 | 18.296      | -65.791      | 757           | 0                 |
| Gould et al 2008                 | 18.292      | -65.783      | 753           | 0                 |
| Gould et al 2008                 | 18.283      | -65.811      | 865           | 0                 |
| 1037796671                       | 18.332572   | -65.783419   | 371           | 0                 |
| 1037797443                       | 18.322116   | -65.82208    | 327           | 0                 |
| 1321882617                       | 18.3521     | -65.766808   | 40            | 0                 |
| 1037797764                       | 18.241308   | -65.7908     | 86            | 0                 |
| 1321151764                       | 18.3111     | -65.7712     | 461           | 0                 |
| 1319867316                       | 18.3016     | -65.7842     | 636           | 0                 |
| 1037796479                       | 18.343092   | -65.761692   | 129           | 0                 |
| 1037809453                       | 18.322848   | -65.765189   | 378           | 0                 |
| 1037797448                       | 18.28       | -65.77       | 877           | 0                 |
| 1037796689                       | 18.34113    | -65.82858    | 136           | 0                 |
| 886858997                        | 18.337257   | -65.760628   | 213           | 1                 |
| 686985846                        | 18.334517   | -65.825112   | 122           | 0                 |

| <b>GBIF and Literature ID</b>    | <b>LAT</b>  | <b>LONG</b>  | <b>Elevation (m)</b> | <b><i>E_hedricki</i></b> |
|----------------------------------|-------------|--------------|----------------------|--------------------------|
| 686986656                        | 18.30757    | -65.77672    | 538                  | 0                        |
| 686986548                        | 18.317617   | -65.831095   | 463                  | 0                        |
| 686986568                        | 18.296603   | -65.841736   | 456                  | 0                        |
| 686986472                        | 18.29872    | -65.78565    | 674                  | 0                        |
| 886790124 , Gould et al 2008     | 18.269      | -65.758      | 1010                 | 0                        |
| 1037809470                       | 18.27221    | -65.83351    | 985                  | 0                        |
| 887917349                        | 18.29919    | -65.78035    | 672                  | 0                        |
| 887170379                        | 18.27557    | -65.78866    | 687                  | 0                        |
| 686784538                        | 18.303578   | -65.777054   | 514                  | 0                        |
| 887917453                        | 18.307633   | -65.794455   | 1000                 | 0                        |
| 1037797851                       | 18.29759    | -65.78951    | 731                  | 0                        |
| 1037797855                       | 18.301      | -65.793      | 911                  | 0                        |
| 1037797847                       | 18.300074   | -65.793412   | 865                  | 0                        |
| 888426833, Drewry and Randy,1983 | 18.311      | -65.791      | 1027                 | 0                        |
| 476566423                        | 18.272      | -65.829      | 1045                 | 0                        |
| 1037796685                       | 18.269      | -65.758      | 1011                 | 0                        |
| 686989627                        | 18.29766    | -65.78722    | 691                  | 0                        |
| 686992146                        | 18.29053    | -65.79074    | 683                  | 0                        |
| 686887253                        | 18.306006   | -65.774821   | 493                  | 0                        |
| 657377329                        | 18.322304   | -65.818666   | 344                  | 0                        |
| 543487714                        | 18.29522    | -65.78853    | 742                  | 0                        |
| 1037797516                       | 18.321198   | -65.81572    | 412                  | 1                        |
| 686989614                        | 18.310852   | -65.792862   | 1024                 | 0                        |
| Joglar, 1998                     | 18.30059444 | -65.78538889 | 661                  | 1                        |
| Joglar, 1998                     | 18.30080556 | -65.79319444 | 850                  | 0                        |
| 888144816                        | 18.30674    | -65.77775    | 560                  | 0                        |
| 1037796651                       | 18.36415    | -65.81964    | 39                   | 0                        |
| 886858926                        | 18.329083   | -65.820517   | 244                  | 0                        |
| 1037796213                       | 18.34654    | -65.7627     | 97                   | 0                        |
| 886890302                        | 18.311866   | -65.77722    | 489                  | 0                        |
| 1037797225                       | 18.27055    | -65.75945    | 985                  | 0                        |
| 1037797430                       | 18.294862   | -65.784617   | 758                  | 0                        |
| 686887247                        | 18.303063   | -65.78429    | 650                  | 0                        |
| Drewry and Randy,1983            | 18.282739   | -65.856976   | 600                  | 1                        |
| 866440579,Drewry and Randy,1983  | 18.32254    | -65.817439   | 371                  | 1                        |
| Gould et al 2008                 | 18.303      | -65.795      | 899                  | 0                        |
| Gould et al 2008                 | 18.296      | -65.791      | 757                  | 0                        |
| Gould et al 2008                 | 18.292      | -65.783      | 753                  | 0                        |
| Gould et al 2008                 | 18.283      | -65.811      | 865                  | 0                        |
| 1037796671                       | 18.332572   | -65.783419   | 371                  | 0                        |
| 1037797443                       | 18.322116   | -65.82208    | 327                  | 0                        |
| 1321882617                       | 18.3521     | -65.766808   | 40                   | 0                        |
| 1037797764                       | 18.241308   | -65.7908     | 86                   | 0                        |
| 1321151764                       | 18.3111     | -65.7712     | 461                  | 0                        |
| 1319867316                       | 18.3016     | -65.7842     | 636                  | 0                        |
| 1037796479                       | 18.343092   | -65.761692   | 129                  | 0                        |
| 1037809453                       | 18.322848   | -65.765189   | 378                  | 0                        |
| 1037797448                       | 18.28       | -65.77       | 877                  | 0                        |
| 1037796689                       | 18.34113    | -65.82858    | 136                  | 0                        |
| 886858997                        | 18.337257   | -65.760628   | 213                  | 0                        |
| 686985846                        | 18.334517   | -65.825112   | 122                  | 0                        |

| GBIF and Literature ID           | LAT         | LONG         | Elevation (m) | <i>E_richmondi</i> |
|----------------------------------|-------------|--------------|---------------|--------------------|
| 686986656                        | 18.30757    | -65.77672    | 538           | 1                  |
| 686986548                        | 18.317617   | -65.831095   | 463           | 0                  |
| 686986568                        | 18.296603   | -65.841736   | 456           | 1                  |
| 686986472                        | 18.29872    | -65.78565    | 674           | 1                  |
| 886790124 , Gould et al 2008     | 18.269      | -65.758      | 1010          | 0                  |
| 1037809470                       | 18.27221    | -65.83351    | 985           | 0                  |
| 887917349                        | 18.29919    | -65.78035    | 672           | 1                  |
| 887170379                        | 18.27557    | -65.78866    | 687           | 0                  |
| 686784538                        | 18.303578   | -65.777054   | 514           | 0                  |
| 887917453                        | 18.307633   | -65.794455   | 1000          | 0                  |
| 1037797851                       | 18.29759    | -65.78951    | 731           | 0                  |
| 1037797855                       | 18.301      | -65.793      | 911           | 1                  |
| 1037797847                       | 18.300074   | -65.793412   | 865           | 1                  |
| 888426833, Drewry and Randy,1983 | 18.311      | -65.791      | 1027          | 1                  |
| 476566423                        | 18.272      | -65.829      | 1045          | 0                  |
| 1037796685                       | 18.269      | -65.758      | 1011          | 0                  |
| 686989627                        | 18.29766    | -65.78722    | 691           | 1                  |
| 686992146                        | 18.29053    | -65.79074    | 683           | 0                  |
| 686887253                        | 18.306006   | -65.774821   | 493           | 0                  |
| 657377329                        | 18.322304   | -65.818666   | 344           | 1                  |
| 543487714                        | 18.29522    | -65.78853    | 742           | 1                  |
| 1037797516                       | 18.321198   | -65.81572    | 412           | 0                  |
| 686989614                        | 18.310852   | -65.792862   | 1024          | 1                  |
| Joglar, 1998                     | 18.30059444 | -65.78538889 | 661           | 1                  |
| Joglar, 1998                     | 18.30080556 | -65.79319444 | 850           | 1                  |
| 888144816                        | 18.30674    | -65.77775    | 560           | 0                  |
| 1037796651                       | 18.36415    | -65.81964    | 39            | 0                  |
| 886858926                        | 18.329083   | -65.820517   | 244           | 0                  |
| 1037796213                       | 18.34654    | -65.7627     | 97            | 0                  |
| 886890302                        | 18.311866   | -65.77722    | 489           | 1                  |
| 1037797225                       | 18.27055    | -65.75945    | 985           | 0                  |
| 1037797430                       | 18.294862   | -65.784617   | 758           | 0                  |
| 686887247                        | 18.303063   | -65.78429    | 650           | 0                  |
| Drewry and Randy,1983            | 18.282739   | -65.856976   | 600           | 1                  |
| 866440579,Drewry and Randy,1983  | 18.32254    | -65.817439   | 371           | 1                  |
| Gould et al 2008                 | 18.303      | -65.795      | 899           | 0                  |
| Gould et al 2008                 | 18.296      | -65.791      | 757           | 0                  |
| Gould et al 2008                 | 18.292      | -65.783      | 753           | 0                  |
| Gould et al 2008                 | 18.283      | -65.811      | 865           | 0                  |
| 1037796671                       | 18.332572   | -65.783419   | 371           | 0                  |
| 1037797443                       | 18.322116   | -65.82208    | 327           | 0                  |
| 1321882617                       | 18.3521     | -65.766808   | 40            | 0                  |
| 1037797764                       | 18.241308   | -65.7908     | 86            | 0                  |
| 1321151764                       | 18.3111     | -65.7712     | 461           | 0                  |
| 1319867316                       | 18.3016     | -65.7842     | 636           | 0                  |
| 1037796479                       | 18.343092   | -65.761692   | 129           | 0                  |
| 1037809453                       | 18.322848   | -65.765189   | 378           | 0                  |
| 1037797448                       | 18.28       | -65.77       | 877           | 0                  |
| 1037796689                       | 18.34113    | -65.82858    | 136           | 0                  |
| 886858997                        | 18.337257   | -65.760628   | 213           | 0                  |
| 686985846                        | 18.334517   | -65.825112   | 122           | 0                  |



| <b>GBIF and Literature ID</b>    | <b>LAT</b>  | <b>LONG</b>  | <b>Elevation (m)</b> | <b><i>E_wightmanae</i></b> |
|----------------------------------|-------------|--------------|----------------------|----------------------------|
| 686986656                        | 18.30757    | -65.77672    | 538                  | 1                          |
| 686986548                        | 18.317617   | -65.831095   | 463                  | 0                          |
| 686986568                        | 18.296603   | -65.841736   | 456                  | 1                          |
| 686986472                        | 18.29872    | -65.78565    | 674                  | 1                          |
| 886790124 , Gould et al 2008     | 18.269      | -65.758      | 1010                 | 0                          |
| 1037809470                       | 18.27221    | -65.83351    | 985                  | 1                          |
| 887917349                        | 18.29919    | -65.78035    | 672                  | 1                          |
| 887170379                        | 18.27557    | -65.78866    | 687                  | 0                          |
| 686784538                        | 18.303578   | -65.777054   | 514                  | 1                          |
| 887917453                        | 18.307633   | -65.794455   | 1000                 | 1                          |
| 1037797851                       | 18.29759    | -65.78951    | 731                  | 0                          |
| 1037797855                       | 18.301      | -65.793      | 911                  | 0                          |
| 1037797847                       | 18.300074   | -65.793412   | 865                  | 1                          |
| 888426833, Drewry and Randy,1983 | 18.311      | -65.791      | 1027                 | 0                          |
| 476566423                        | 18.272      | -65.829      | 1045                 | 0                          |
| 1037796685                       | 18.269      | -65.758      | 1011                 | 0                          |
| 686989627                        | 18.29766    | -65.78722    | 691                  | 1                          |
| 686992146                        | 18.29053    | -65.79074    | 683                  | 1                          |
| 686887253                        | 18.306006   | -65.774821   | 493                  | 1                          |
| 657377329                        | 18.322304   | -65.818666   | 344                  | 1                          |
| 543487714                        | 18.29522    | -65.78853    | 742                  | 1                          |
| 1037797516                       | 18.321198   | -65.81572    | 412                  | 1                          |
| 686989614                        | 18.310852   | -65.792862   | 1024                 | 0                          |
| Joglar, 1998                     | 18.30059444 | -65.78538889 | 661                  | 1                          |
| Joglar, 1998                     | 18.30080556 | -65.79319444 | 850                  | 1                          |
| 888144816                        | 18.30674    | -65.77775    | 560                  | 0                          |
| 1037796651                       | 18.36415    | -65.81964    | 39                   | 0                          |
| 886858926                        | 18.329083   | -65.820517   | 244                  | 0                          |
| 1037796213                       | 18.34654    | -65.7627     | 97                   | 0                          |
| 886890302                        | 18.311866   | -65.77722    | 489                  | 0                          |
| 1037797225                       | 18.27055    | -65.75945    | 985                  | 0                          |
| 1037797430                       | 18.294862   | -65.784617   | 758                  | 0                          |
| 686887247                        | 18.303063   | -65.78429    | 650                  | 0                          |
| Drewry and Randy,1983            | 18.282739   | -65.856976   | 600                  | 1                          |
| 866440579,Drewry and Randy,1983  | 18.32254    | -65.817439   | 371                  | 1                          |
| Gould et al 2008                 | 18.303      | -65.795      | 899                  | 0                          |
| Gould et al 2008                 | 18.296      | -65.791      | 757                  | 0                          |
| Gould et al 2008                 | 18.292      | -65.783      | 753                  | 0                          |
| Gould et al 2008                 | 18.283      | -65.811      | 865                  | 0                          |
| 1037796671                       | 18.332572   | -65.783419   | 371                  | 0                          |
| 1037797443                       | 18.322116   | -65.82208    | 327                  | 0                          |
| 1321882617                       | 18.3521     | -65.766808   | 40                   | 0                          |
| 1037797764                       | 18.241308   | -65.7908     | 86                   | 0                          |
| 1321151764                       | 18.3111     | -65.7712     | 461                  | 0                          |
| 1319867316                       | 18.3016     | -65.7842     | 636                  | 0                          |
| 1037796479                       | 18.343092   | -65.761692   | 129                  | 0                          |
| 1037809453                       | 18.322848   | -65.765189   | 378                  | 0                          |
| 1037797448                       | 18.28       | -65.77       | 877                  | 0                          |
| 1037796689                       | 18.34113    | -65.82858    | 136                  | 0                          |
| 886858997                        | 18.337257   | -65.760628   | 213                  | 0                          |
| 686985846                        | 18.334517   | -65.825112   | 122                  | 0                          |

| <b>GBIF and Literature ID</b>    | <b>LAT</b>  | <b>LONG</b>  | <b>Elevation (m)</b> | <b><i>E_unicolor</i></b> |
|----------------------------------|-------------|--------------|----------------------|--------------------------|
| 686986656                        | 18.30757    | -65.77672    | 538                  | 0                        |
| 686986548                        | 18.317617   | -65.831095   | 463                  | 0                        |
| 686986568                        | 18.296603   | -65.841736   | 456                  | 0                        |
| 686986472                        | 18.29872    | -65.78565    | 674                  | 0                        |
| 886790124 , Gould et al 2008     | 18.269      | -65.758      | 1010                 | 0                        |
| 1037809470                       | 18.27221    | -65.83351    | 985                  | 0                        |
| 887917349                        | 18.29919    | -65.78035    | 672                  | 0                        |
| 887170379                        | 18.27557    | -65.78866    | 687                  | 0                        |
| 686784538                        | 18.303578   | -65.777054   | 514                  | 0                        |
| 887917453                        | 18.307633   | -65.794455   | 1000                 | 0                        |
| 1037797851                       | 18.29759    | -65.78951    | 731                  | 0                        |
| 1037797855                       | 18.301      | -65.793      | 911                  | 0                        |
| 1037797847                       | 18.300074   | -65.793412   | 865                  | 0                        |
| 888426833, Drewry and Randy,1983 | 18.311      | -65.791      | 1027                 | 1                        |
| 476566423                        | 18.272      | -65.829      | 1045                 | 0                        |
| 1037796685                       | 18.269      | -65.758      | 1011                 | 0                        |
| 686989627                        | 18.29766    | -65.78722    | 691                  | 0                        |
| 686992146                        | 18.29053    | -65.79074    | 683                  | 0                        |
| 686887253                        | 18.306006   | -65.774821   | 493                  | 0                        |
| 657377329                        | 18.322304   | -65.818666   | 344                  | 0                        |
| 543487714                        | 18.29522    | -65.78853    | 742                  | 0                        |
| 1037797516                       | 18.321198   | -65.81572    | 412                  | 0                        |
| 686989614                        | 18.310852   | -65.792862   | 1024                 | 1                        |
| Joglar, 1998                     | 18.30059444 | -65.78538889 | 661                  | 0                        |
| Joglar, 1998                     | 18.30080556 | -65.79319444 | 850                  | 1                        |
| 888144816                        | 18.30674    | -65.77775    | 560                  | 0                        |
| 1037796651                       | 18.36415    | -65.81964    | 39                   | 0                        |
| 886858926                        | 18.329083   | -65.820517   | 244                  | 0                        |
| 1037796213                       | 18.34654    | -65.7627     | 97                   | 0                        |
| 886890302                        | 18.311866   | -65.77722    | 489                  | 0                        |
| 1037797225                       | 18.27055    | -65.75945    | 985                  | 0                        |
| 1037797430                       | 18.294862   | -65.784617   | 758                  | 0                        |
| 686887247                        | 18.303063   | -65.78429    | 650                  | 0                        |
| Drewry and Randy,1983            | 18.282739   | -65.856976   | 600                  | 0                        |
| 866440579,Drewry and Randy,1983  | 18.32254    | -65.817439   | 371                  | 0                        |
| Gould et al 2008                 | 18.303      | -65.795      | 899                  | 0                        |
| Gould et al 2008                 | 18.296      | -65.791      | 757                  | 0                        |
| Gould et al 2008                 | 18.292      | -65.783      | 753                  | 0                        |
| Gould et al 2008                 | 18.283      | -65.811      | 865                  | 0                        |
| 1037796671                       | 18.332572   | -65.783419   | 371                  | 0                        |
| 1037797443                       | 18.322116   | -65.82208    | 327                  | 0                        |
| 1321882617                       | 18.3521     | -65.766808   | 40                   | 0                        |
| 1037797764                       | 18.241308   | -65.7908     | 86                   | 0                        |
| 1321151764                       | 18.3111     | -65.7712     | 461                  | 0                        |
| 1319867316                       | 18.3016     | -65.7842     | 636                  | 0                        |
| 1037796479                       | 18.343092   | -65.761692   | 129                  | 0                        |
| 1037809453                       | 18.322848   | -65.765189   | 378                  | 0                        |
| 1037797448                       | 18.28       | -65.77       | 877                  | 0                        |
| 1037796689                       | 18.34113    | -65.82858    | 136                  | 0                        |
| 886858997                        | 18.337257   | -65.760628   | 213                  | 0                        |
| 686985846                        | 18.334517   | -65.825112   | 122                  | 0                        |

| GBIF and Literature ID           | LAT         | LONG         | Elevation (m) | <i>E_antillensis</i> |
|----------------------------------|-------------|--------------|---------------|----------------------|
| 686986656                        | 18.30757    | -65.77672    | 538           | 0                    |
| 686986548                        | 18.317617   | -65.831095   | 463           | 0                    |
| 686986568                        | 18.296603   | -65.841736   | 456           | 1                    |
| 686986472                        | 18.29872    | -65.78565    | 674           | 0                    |
| 886790124 , Gould et al 2008     | 18.269      | -65.758      | 1010          | 0                    |
| 1037809470                       | 18.27221    | -65.83351    | 985           | 0                    |
| 887917349                        | 18.29919    | -65.78035    | 672           | 0                    |
| 887170379                        | 18.27557    | -65.78866    | 687           | 0                    |
| 686784538                        | 18.303578   | -65.777054   | 514           | 0                    |
| 887917453                        | 18.307633   | -65.794455   | 1000          | 0                    |
| 1037797851                       | 18.29759    | -65.78951    | 731           | 1                    |
| 1037797855                       | 18.301      | -65.793      | 911           | 0                    |
| 1037797847                       | 18.300074   | -65.793412   | 865           | 0                    |
| 888426833, Drewry and Randy,1983 | 18.311      | -65.791      | 1027          | 0                    |
| 476566423                        | 18.272      | -65.829      | 1045          | 0                    |
| 1037796685                       | 18.269      | -65.758      | 1011          | 0                    |
| 686989627                        | 18.29766    | -65.78722    | 691           | 0                    |
| 686992146                        | 18.29053    | -65.79074    | 683           | 0                    |
| 686887253                        | 18.306006   | -65.774821   | 493           | 0                    |
| 657377329                        | 18.322304   | -65.818666   | 344           | 0                    |
| 543487714                        | 18.29522    | -65.78853    | 742           | 0                    |
| 1037797516                       | 18.321198   | -65.81572    | 412           | 1                    |
| 686989614                        | 18.310852   | -65.792862   | 1024          | 0                    |
| Joglar, 1998                     | 18.30059444 | -65.78538889 | 661           | 0                    |
| Joglar, 1998                     | 18.30080556 | -65.79319444 | 850           | 0                    |
| 888144816                        | 18.30674    | -65.77775    | 560           | 0                    |
| 1037796651                       | 18.36415    | -65.81964    | 39            | 1                    |
| 886858926                        | 18.329083   | -65.820517   | 244           | 0                    |
| 1037796213                       | 18.34654    | -65.7627     | 97            | 0                    |
| 886890302                        | 18.311866   | -65.77722    | 489           | 0                    |
| 1037797225                       | 18.27055    | -65.75945    | 985           | 0                    |
| 1037797430                       | 18.294862   | -65.784617   | 758           | 0                    |
| 686887247                        | 18.303063   | -65.78429    | 650           | 0                    |
| Drewry and Randy,1983            | 18.282739   | -65.856976   | 600           | 0                    |
| 866440579,Drewry and Randy,1983  | 18.32254    | -65.817439   | 371           | 1                    |
| Gould et al 2008                 | 18.303      | -65.795      | 899           | 0                    |
| Gould et al 2008                 | 18.296      | -65.791      | 757           | 0                    |
| Gould et al 2008                 | 18.292      | -65.783      | 753           | 0                    |
| Gould et al 2008                 | 18.283      | -65.811      | 865           | 0                    |
| 1037796671                       | 18.332572   | -65.783419   | 371           | 1                    |
| 1037797443                       | 18.322116   | -65.82208    | 327           | 1                    |
| 1321882617                       | 18.3521     | -65.766808   | 40            | 1                    |
| 1037797764                       | 18.241308   | -65.7908     | 86            | 1                    |
| 1321151764                       | 18.3111     | -65.7712     | 461           | 0                    |
| 1319867316                       | 18.3016     | -65.7842     | 636           | 0                    |
| 1037796479                       | 18.343092   | -65.761692   | 129           | 0                    |
| 1037809453                       | 18.322848   | -65.765189   | 378           | 0                    |
| 1037797448                       | 18.28       | -65.77       | 877           | 0                    |
| 1037796689                       | 18.34113    | -65.82858    | 136           | 1                    |
| 886858997                        | 18.337257   | -65.760628   | 213           | 0                    |
| 686985846                        | 18.334517   | -65.825112   | 122           | 0                    |

| GBIF and Literature ID           | LAT         | LONG         | Elevation (m) | <i>E_cochranae</i> |
|----------------------------------|-------------|--------------|---------------|--------------------|
| 686986656                        | 18.30757    | -65.77672    | 538           | 0                  |
| 686986548                        | 18.317617   | -65.831095   | 463           | 0                  |
| 686986568                        | 18.296603   | -65.841736   | 456           | 0                  |
| 686986472                        | 18.29872    | -65.78565    | 674           | 0                  |
| 886790124 , Gould et al 2008     | 18.269      | -65.758      | 1010          | 0                  |
| 1037809470                       | 18.27221    | -65.83351    | 985           | 0                  |
| 887917349                        | 18.29919    | -65.78035    | 672           | 0                  |
| 887170379                        | 18.27557    | -65.78866    | 687           | 0                  |
| 686784538                        | 18.303578   | -65.777054   | 514           | 0                  |
| 887917453                        | 18.307633   | -65.794455   | 1000          | 0                  |
| 1037797851                       | 18.29759    | -65.78951    | 731           | 0                  |
| 1037797855                       | 18.301      | -65.793      | 911           | 0                  |
| 1037797847                       | 18.300074   | -65.793412   | 865           | 0                  |
| 888426833, Drewry and Randy,1983 | 18.311      | -65.791      | 1027          | 0                  |
| 476566423                        | 18.272      | -65.829      | 1045          | 0                  |
| 1037796685                       | 18.269      | -65.758      | 1011          | 0                  |
| 686989627                        | 18.29766    | -65.78722    | 691           | 0                  |
| 686992146                        | 18.29053    | -65.79074    | 683           | 0                  |
| 686887253                        | 18.306006   | -65.774821   | 493           | 0                  |
| 657377329                        | 18.322304   | -65.818666   | 344           | 0                  |
| 543487714                        | 18.29522    | -65.78853    | 742           | 1                  |
| 1037797516                       | 18.321198   | -65.81572    | 412           | 0                  |
| 686989614                        | 18.310852   | -65.792862   | 1024          | 0                  |
| Joglar, 1998                     | 18.30059444 | -65.78538889 | 661           | 0                  |
| Joglar, 1998                     | 18.30080556 | -65.79319444 | 850           | 0                  |
| 888144816                        | 18.30674    | -65.77775    | 560           | 0                  |
| 1037796651                       | 18.36415    | -65.81964    | 39            | 0                  |
| 886858926                        | 18.329083   | -65.820517   | 244           | 0                  |
| 1037796213                       | 18.34654    | -65.7627     | 97            | 1                  |
| 886890302                        | 18.311866   | -65.77722    | 489           | 0                  |
| 1037797225                       | 18.27055    | -65.75945    | 985           | 0                  |
| 1037797430                       | 18.294862   | -65.784617   | 758           | 0                  |
| 686887247                        | 18.303063   | -65.78429    | 650           | 0                  |
| Drewry and Randy,1983            | 18.282739   | -65.856976   | 600           | 0                  |
| 866440579,Drewry and Randy,1983  | 18.32254    | -65.817439   | 371           | 0                  |
| Gould et al 2008                 | 18.303      | -65.795      | 899           | 0                  |
| Gould et al 2008                 | 18.296      | -65.791      | 757           | 0                  |
| Gould et al 2008                 | 18.292      | -65.783      | 753           | 0                  |
| Gould et al 2008                 | 18.283      | -65.811      | 865           | 0                  |
| 1037796671                       | 18.332572   | -65.783419   | 371           | 0                  |
| 1037797443                       | 18.322116   | -65.82208    | 327           | 0                  |
| 1321882617                       | 18.3521     | -65.766808   | 40            | 1                  |
| 1037797764                       | 18.241308   | -65.7908     | 86            | 0                  |
| 1321151764                       | 18.3111     | -65.7712     | 461           | 0                  |
| 1319867316                       | 18.3016     | -65.7842     | 636           | 0                  |
| 1037796479                       | 18.343092   | -65.761692   | 129           | 0                  |
| 1037809453                       | 18.322848   | -65.765189   | 378           | 0                  |
| 1037797448                       | 18.28       | -65.77       | 877           | 0                  |
| 1037796689                       | 18.34113    | -65.82858    | 136           | 0                  |
| 886858997                        | 18.337257   | -65.760628   | 213           | 0                  |
| 686985846                        | 18.334517   | -65.825112   | 122           | 0                  |

| GBIF and Literature ID           | LAT         | LONG         | Elevation (m) | <i>L_albilabris</i> |
|----------------------------------|-------------|--------------|---------------|---------------------|
| 686986656                        | 18.30757    | -65.77672    | 538           | 0                   |
| 686986548                        | 18.317617   | -65.831095   | 463           | 1                   |
| 686986568                        | 18.296603   | -65.841736   | 456           | 0                   |
| 686986472                        | 18.29872    | -65.78565    | 674           | 1                   |
| 886790124 , Gould et al 2008     | 18.269      | -65.758      | 1010          | 1                   |
| 1037809470                       | 18.27221    | -65.83351    | 985           | 0                   |
| 887917349                        | 18.29919    | -65.78035    | 672           | 0                   |
| 887170379                        | 18.27557    | -65.78866    | 687           | 0                   |
| 686784538                        | 18.303578   | -65.777054   | 514           | 0                   |
| 887917453                        | 18.307633   | -65.794455   | 1000          | 0                   |
| 1037797851                       | 18.29759    | -65.78951    | 731           | 0                   |
| 1037797855                       | 18.301      | -65.793      | 911           | 0                   |
| 1037797847                       | 18.300074   | -65.793412   | 865           | 0                   |
| 888426833, Drewry and Randy,1983 | 18.311      | -65.791      | 1027          | 0                   |
| 476566423                        | 18.272      | -65.829      | 1045          | 0                   |
| 1037796685                       | 18.269      | -65.758      | 1011          | 0                   |
| 686989627                        | 18.29766    | -65.78722    | 691           | 1                   |
| 686992146                        | 18.29053    | -65.79074    | 683           | 1                   |
| 686887253                        | 18.306006   | -65.774821   | 493           | 0                   |
| 657377329                        | 18.322304   | -65.818666   | 344           | 1                   |
| 543487714                        | 18.29522    | -65.78853    | 742           | 0                   |
| 1037797516                       | 18.321198   | -65.81572    | 412           | 1                   |
| 686989614                        | 18.310852   | -65.792862   | 1024          | 0                   |
| Joglar, 1998                     | 18.30059444 | -65.78538889 | 661           | 0                   |
| Joglar, 1998                     | 18.30080556 | -65.79319444 | 850           | 0                   |
| 888144816                        | 18.30674    | -65.77775    | 560           | 0                   |
| 1037796651                       | 18.36415    | -65.81964    | 39            | 0                   |
| 886858926                        | 18.329083   | -65.820517   | 244           | 0                   |
| 1037796213                       | 18.34654    | -65.7627     | 97            | 1                   |
| 886890302                        | 18.311866   | -65.77722    | 489           | 0                   |
| 1037797225                       | 18.27055    | -65.75945    | 985           | 0                   |
| 1037797430                       | 18.294862   | -65.784617   | 758           | 0                   |
| 686887247                        | 18.303063   | -65.78429    | 650           | 0                   |
| Drewry and Randy,1983            | 18.282739   | -65.856976   | 600           | 0                   |
| 866440579,Drewry and Randy,1983  | 18.32254    | -65.817439   | 371           | 0                   |
| Gould et al 2008                 | 18.303      | -65.795      | 899           | 0                   |
| Gould et al 2008                 | 18.296      | -65.791      | 757           | 0                   |
| Gould et al 2008                 | 18.292      | -65.783      | 753           | 0                   |
| Gould et al 2008                 | 18.283      | -65.811      | 865           | 0                   |
| 1037796671                       | 18.332572   | -65.783419   | 371           | 0                   |
| 1037797443                       | 18.322116   | -65.82208    | 327           | 0                   |
| 1321882617                       | 18.3521     | -65.766808   | 40            | 0                   |
| 1037797764                       | 18.241308   | -65.7908     | 86            | 0                   |
| 1321151764                       | 18.3111     | -65.7712     | 461           | 0                   |
| 1319867316                       | 18.3016     | -65.7842     | 636           | 0                   |
| 1037796479                       | 18.343092   | -65.761692   | 129           | 0                   |
| 1037809453                       | 18.322848   | -65.765189   | 378           | 0                   |
| 1037797448                       | 18.28       | -65.77       | 877           | 0                   |
| 1037796689                       | 18.34113    | -65.82858    | 136           | 0                   |
| 886858997                        | 18.337257   | -65.760628   | 213           | 0                   |
| 686985846                        | 18.334517   | -65.825112   | 122           | 0                   |

| GBIF and Literature ID           | LAT         | LONG         | Elevation (m) | <i>E_eneidae</i> |
|----------------------------------|-------------|--------------|---------------|------------------|
| 686986656                        | 18.30757    | -65.77672    | 538           | 1                |
| 686986548                        | 18.317617   | -65.831095   | 463           | 0                |
| 686986568                        | 18.296603   | -65.841736   | 456           | 0                |
| 686986472                        | 18.29872    | -65.78565    | 674           | 1                |
| 886790124 , Gould et al 2008     | 18.269      | -65.758      | 1010          | 0                |
| 1037809470                       | 18.27221    | -65.83351    | 985           | 0                |
| 887917349                        | 18.29919    | -65.78035    | 672           | 0                |
| 887170379                        | 18.27557    | -65.78866    | 687           | 0                |
| 686784538                        | 18.303578   | -65.777054   | 514           | 1                |
| 887917453                        | 18.307633   | -65.794455   | 1000          | 1                |
| 1037797851                       | 18.29759    | -65.78951    | 731           | 0                |
| 1037797855                       | 18.301      | -65.793      | 911           | 0                |
| 1037797847                       | 18.300074   | -65.793412   | 865           | 1                |
| 888426833, Drewry and Randy,1983 | 18.311      | -65.791      | 1027          | 0                |
| 476566423                        | 18.272      | -65.829      | 1045          | 0                |
| 1037796685                       | 18.269      | -65.758      | 1011          | 0                |
| 686989627                        | 18.29766    | -65.78722    | 691           | 1                |
| 686992146                        | 18.29053    | -65.79074    | 683           | 0                |
| 686887253                        | 18.306006   | -65.774821   | 493           | 0                |
| 657377329                        | 18.322304   | -65.818666   | 344           | 0                |
| 543487714                        | 18.29522    | -65.78853    | 742           | 1                |
| 1037797516                       | 18.321198   | -65.81572    | 412           | 0                |
| 686989614                        | 18.310852   | -65.792862   | 1024          | 0                |
| Joglar, 1998                     | 18.30059444 | -65.78538889 | 661           | 0                |
| Joglar, 1998                     | 18.30080556 | -65.79319444 | 850           | 0                |
| 888144816                        | 18.30674    | -65.77775    | 560           | 0                |
| 1037796651                       | 18.36415    | -65.81964    | 39            | 0                |
| 886858926                        | 18.329083   | -65.820517   | 244           | 0                |
| 1037796213                       | 18.34654    | -65.7627     | 97            | 0                |
| 886890302                        | 18.311866   | -65.77722    | 489           | 0                |
| 1037797225                       | 18.27055    | -65.75945    | 985           | 0                |
| 1037797430                       | 18.294862   | -65.784617   | 758           | 0                |
| 686887247                        | 18.303063   | -65.78429    | 650           | 0                |
| Drewry and Randy,1983            | 18.282739   | -65.856976   | 600           | 1                |
| 866440579,Drewry and Randy,1983  | 18.32254    | -65.817439   | 371           | 1                |
| Gould et al 2008                 | 18.303      | -65.795      | 899           | 0                |
| Gould et al 2008                 | 18.296      | -65.791      | 757           | 0                |
| Gould et al 2008                 | 18.292      | -65.783      | 753           | 0                |
| Gould et al 2008                 | 18.283      | -65.811      | 865           | 0                |
| 1037796671                       | 18.332572   | -65.783419   | 371           | 0                |
| 1037797443                       | 18.322116   | -65.82208    | 327           | 0                |
| 1321882617                       | 18.3521     | -65.766808   | 40            | 0                |
| 1037797764                       | 18.241308   | -65.7908     | 86            | 0                |
| 1321151764                       | 18.3111     | -65.7712     | 461           | 0                |
| 1319867316                       | 18.3016     | -65.7842     | 636           | 0                |
| 1037796479                       | 18.343092   | -65.761692   | 129           | 0                |
| 1037809453                       | 18.322848   | -65.765189   | 378           | 0                |
| 1037797448                       | 18.28       | -65.77       | 877           | 0                |
| 1037796689                       | 18.34113    | -65.82858    | 136           | 0                |
| 886858997                        | 18.337257   | -65.760628   | 213           | 0                |
| 686985846                        | 18.334517   | -65.825112   | 122           | 0                |

| <b>GBIF and Literature ID</b>    | <b>LAT</b>  | <b>LONG</b>  | <b>Elevation (m)</b> | <b><i>E_karlschmidti</i></b> |
|----------------------------------|-------------|--------------|----------------------|------------------------------|
| 686986656                        | 18.30757    | -65.77672    | 538                  | 1                            |
| 686986548                        | 18.317617   | -65.831095   | 463                  | 0                            |
| 686986568                        | 18.296603   | -65.841736   | 456                  | 0                            |
| 686986472                        | 18.29872    | -65.78565    | 674                  | 1                            |
| 886790124 , Gould et al 2008     | 18.269      | -65.758      | 1010                 | 0                            |
| 1037809470                       | 18.27221    | -65.83351    | 985                  | 0                            |
| 887917349                        | 18.29919    | -65.78035    | 672                  | 0                            |
| 887170379                        | 18.27557    | -65.78866    | 687                  | 0                            |
| 686784538                        | 18.303578   | -65.777054   | 514                  | 1                            |
| 887917453                        | 18.307633   | -65.794455   | 1000                 | 0                            |
| 1037797851                       | 18.29759    | -65.78951    | 731                  | 0                            |
| 1037797855                       | 18.301      | -65.793      | 911                  | 0                            |
| 1037797847                       | 18.300074   | -65.793412   | 865                  | 0                            |
| 888426833, Drewry and Randy,1983 | 18.311      | -65.791      | 1027                 | 0                            |
| 476566423                        | 18.272      | -65.829      | 1045                 | 0                            |
| 1037796685                       | 18.269      | -65.758      | 1011                 | 0                            |
| 686989627                        | 18.29766    | -65.78722    | 691                  | 1                            |
| 686992146                        | 18.29053    | -65.79074    | 683                  | 0                            |
| 686887253                        | 18.306006   | -65.774821   | 493                  | 0                            |
| 657377329                        | 18.322304   | -65.818666   | 344                  | 0                            |
| 543487714                        | 18.29522    | -65.78853    | 742                  | 0                            |
| 1037797516                       | 18.321198   | -65.81572    | 412                  | 0                            |
| 686989614                        | 18.310852   | -65.792862   | 1024                 | 0                            |
| Joglar, 1998                     | 18.30059444 | -65.78538889 | 661                  | 0                            |
| Joglar, 1998                     | 18.30080556 | -65.79319444 | 850                  | 0                            |
| 888144816                        | 18.30674    | -65.77775    | 560                  | 0                            |
| 1037796651                       | 18.36415    | -65.81964    | 39                   | 0                            |
| 886858926                        | 18.329083   | -65.820517   | 244                  | 0                            |
| 1037796213                       | 18.34654    | -65.7627     | 97                   | 0                            |
| 886890302                        | 18.311866   | -65.77722    | 489                  | 0                            |
| 1037797225                       | 18.27055    | -65.75945    | 985                  | 0                            |
| 1037797430                       | 18.294862   | -65.784617   | 758                  | 0                            |
| 686887247                        | 18.303063   | -65.78429    | 650                  | 0                            |
| Drewry and Randy,1983            | 18.282739   | -65.856976   | 600                  | 1                            |
| 866440579,Drewry and Randy,1983  | 18.32254    | -65.817439   | 371                  | 1                            |
| Gould et al 2008                 | 18.303      | -65.795      | 899                  | 0                            |
| Gould et al 2008                 | 18.296      | -65.791      | 757                  | 0                            |
| Gould et al 2008                 | 18.292      | -65.783      | 753                  | 0                            |
| Gould et al 2008                 | 18.283      | -65.811      | 865                  | 0                            |
| 1037796671                       | 18.332572   | -65.783419   | 371                  | 0                            |
| 1037797443                       | 18.322116   | -65.82208    | 327                  | 0                            |
| 1321882617                       | 18.3521     | -65.766808   | 40                   | 0                            |
| 1037797764                       | 18.241308   | -65.7908     | 86                   | 0                            |
| 1321151764                       | 18.3111     | -65.7712     | 461                  | 0                            |
| 1319867316                       | 18.3016     | -65.7842     | 636                  | 0                            |
| 1037796479                       | 18.343092   | -65.761692   | 129                  | 0                            |
| 1037809453                       | 18.322848   | -65.765189   | 378                  | 0                            |
| 1037797448                       | 18.28       | -65.77       | 877                  | 0                            |
| 1037796689                       | 18.34113    | -65.82858    | 136                  | 0                            |
| 886858997                        | 18.337257   | -65.760628   | 213                  | 0                            |
| 686985846                        | 18.334517   | -65.825112   | 122                  | 0                            |
